# Supplementary material
Source: publisher figshare collection journal article supplement (https://tandf.figshare.com/articles/dataset/_/27641807)
Supplement: Supplementary file 1 [file 1]

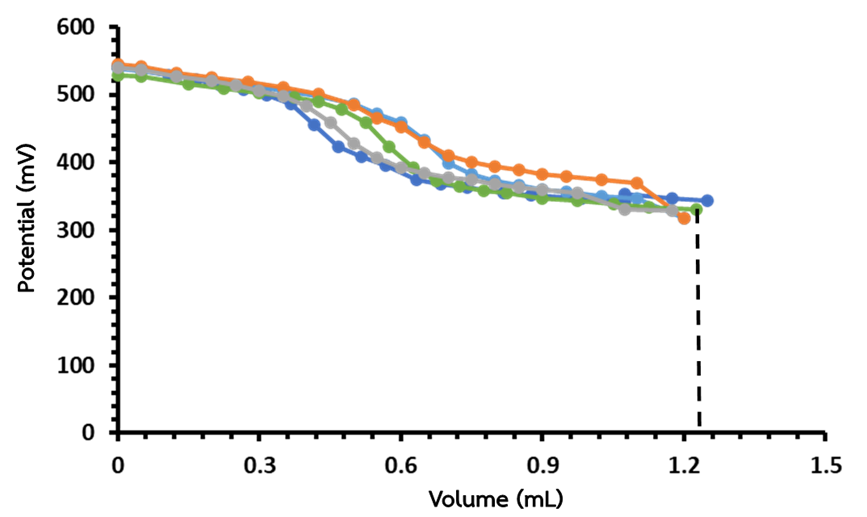


**Figure S1.** Potentiometric titration profile of in PVP-I ( ), physical mixtures ( ), physical mixtures + poloxamer 407( )**,** kneading ( ) and kneading + poloxamer 407 ( ) (Mean ± SD, n = 3).


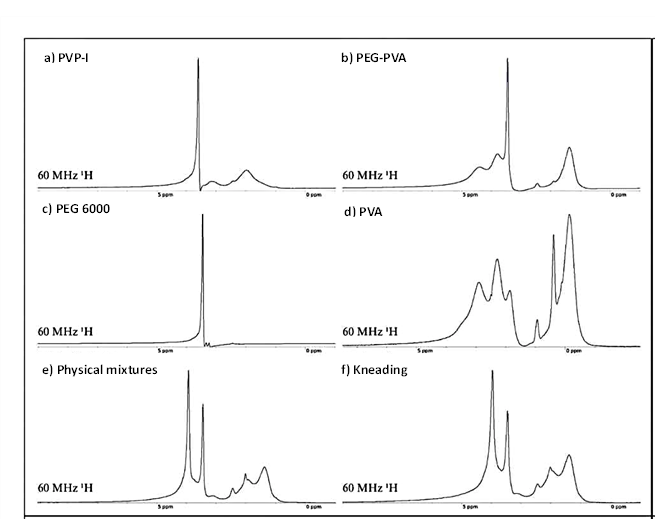


**(A)**


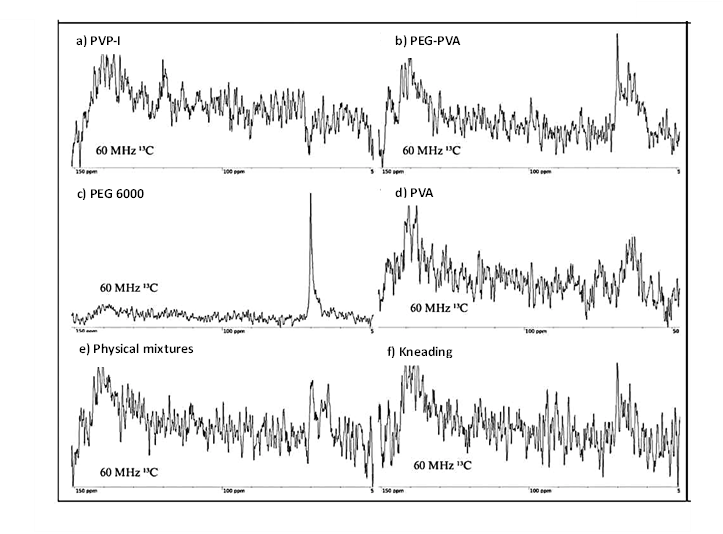


**(B)**

**Figure S2.** **(A)** 60 MHz 1H spectra and **(B)** 60 MHz 13C spectraof **a-f;** PVP-I, PEG-PVA, PEG 6000, PVA, physical mixtures and kneading, respectively, which dissolved in DMSO-d6.

**(A)**

**(B)**


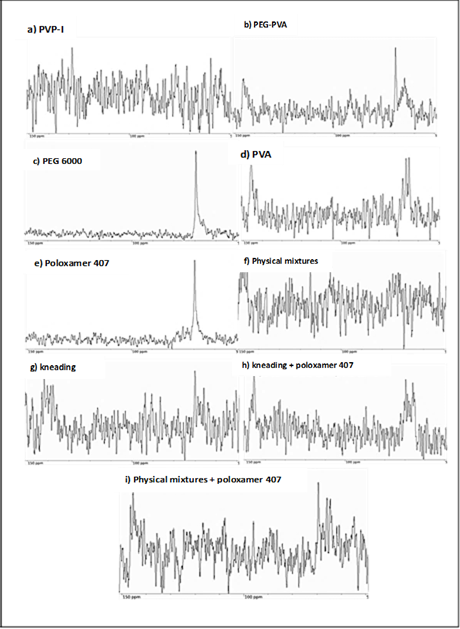

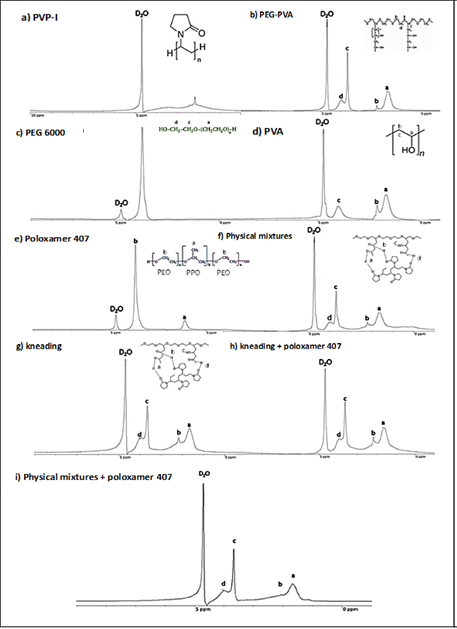


**Figure S3.** **(A)** 60 MHz 1H spectra and **(B)** of 60 MHz 13C spectra of **a-i**; PVP-I, PEG-PVA, PEG 6000, PVA, physical mixtures and kneading, physical mixtures + poloxamer 407, kneading + poloxamer 407 respectively, which dissolved in in D2O.
